# Supplementary material
Source: publisher figshare collection journal article supplement (https://tandf.figshare.com/articles/dataset/_/3112348)
Supplement: Supplementary file 1 [file 1]

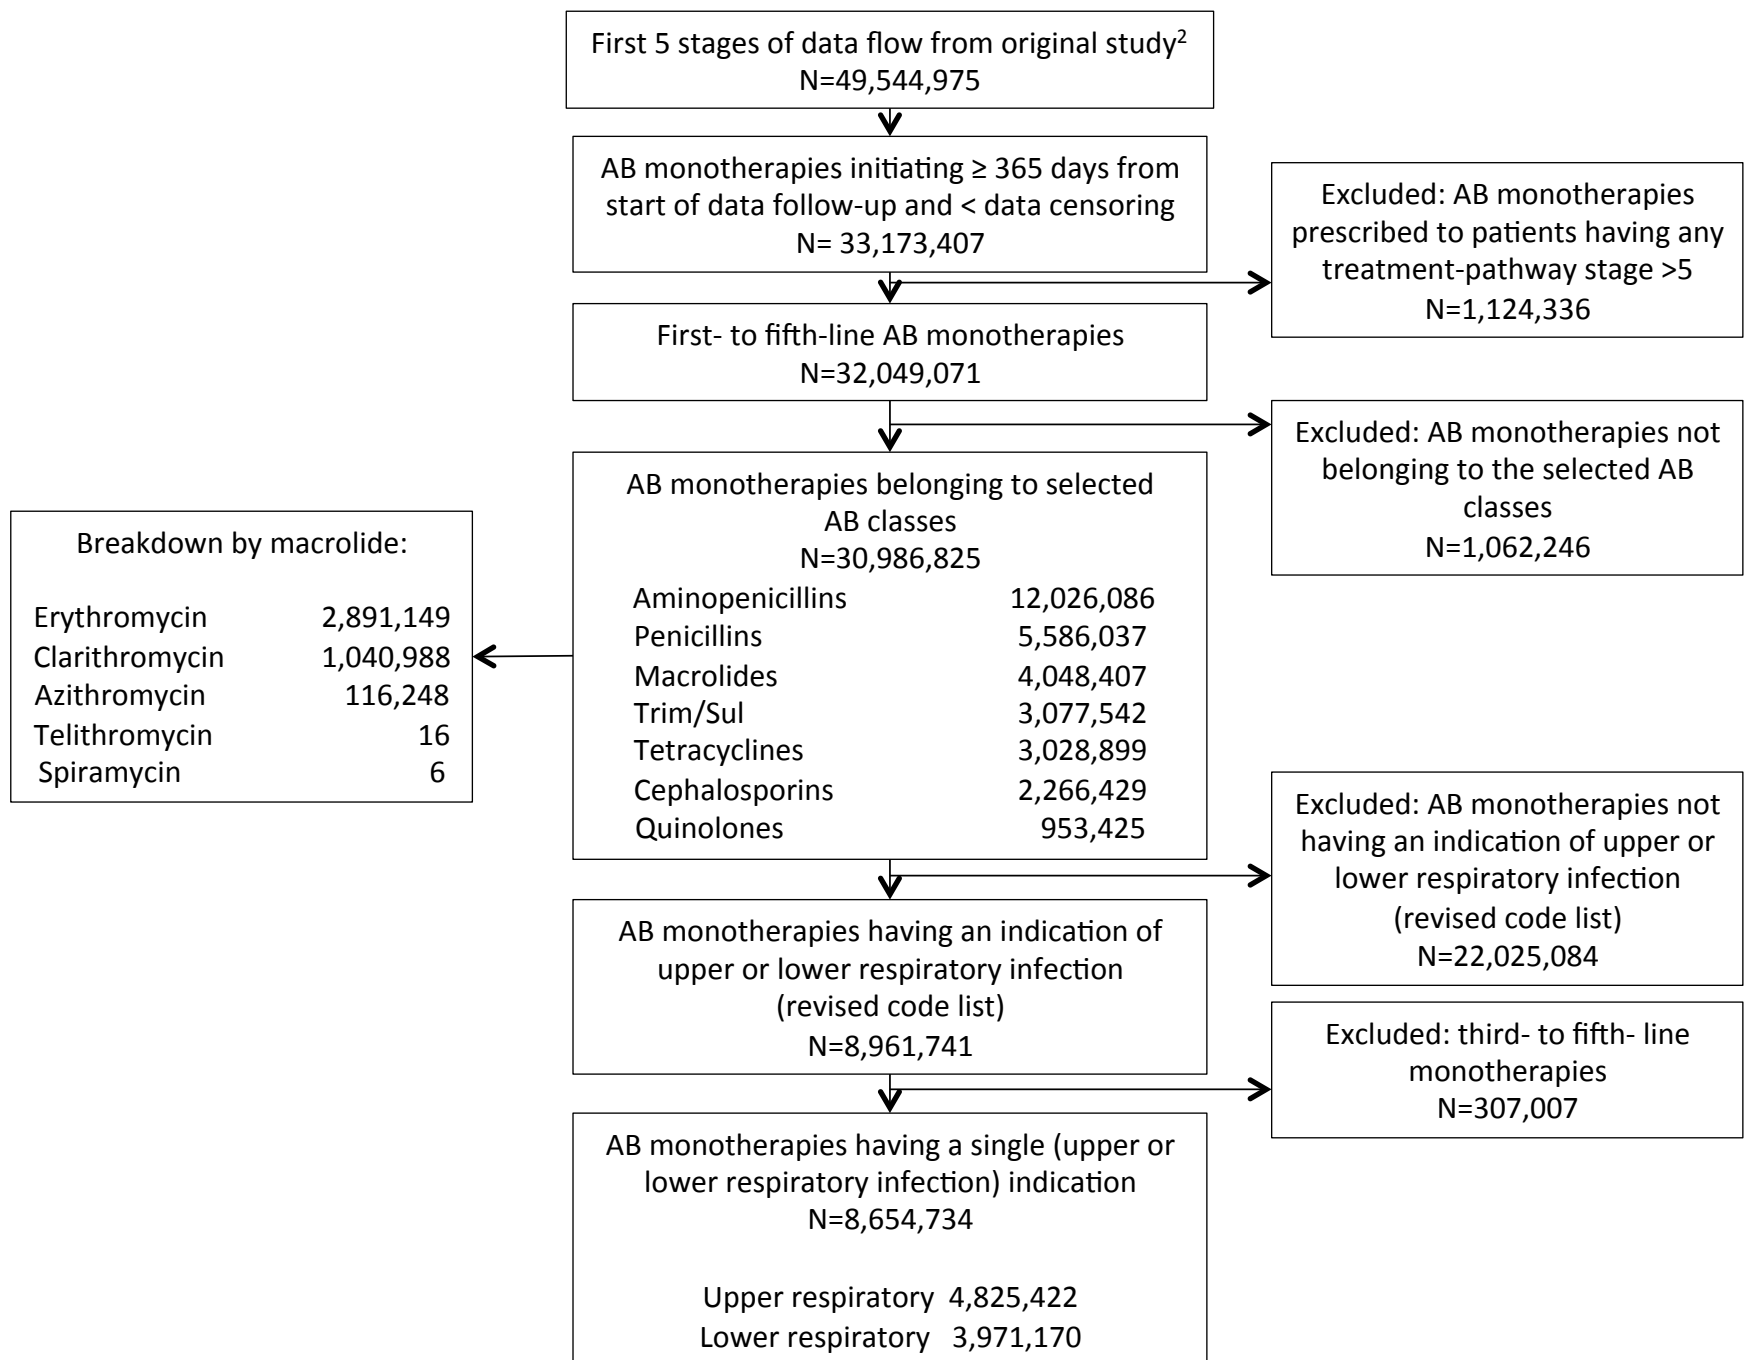

Supplementary Figure 2 | The process of allocating antibiotic prescription to treatment line and indication
